# Clinical Characteristics of Refractory Coronavirus Disease 2019 in Wuhan, China

Pingzheng Mo,<sup>1,a</sup> Yuanyuan Xing,<sup>2,a</sup> Yu Xiao,<sup>2,a</sup> Liping Deng,<sup>1,a</sup> Qiu Zhao,<sup>3</sup> Hongling Wang,<sup>3</sup> Yong Xiong,<sup>1</sup> Zhenshun Cheng,<sup>4</sup> Shicheng Gao,<sup>1</sup> Ke Liang,<sup>1</sup> Mingqi Luo,<sup>1</sup> Tielong Chen,<sup>1</sup> Shihui Song,<sup>1</sup> Zhiyong Ma,<sup>1</sup> Xiaoping Chen,<sup>1</sup> Ruiying Zheng,<sup>1</sup> Qian Cao,<sup>1</sup> Fan Wang,<sup>3</sup> and Yongxi Zhang<sup>1</sup>

<sup>1</sup>Department of Infectious Disease, Zhongnan Hospital of Wuhan University, Wuhan, Hubei, China, <sup>2</sup>Department of Biological Repositories, Zhongnan Hospital of Wuhan University, Wuhan, Hubei, China, <sup>3</sup>Department of Gastroenterology, Zhongnan Hospital of Wuhan University, Wuhan, Hubei, China, and <sup>4</sup>Department of Respiratory Medicine, Zhongnan Hospital of Wuhan University, Wuhan, Hubei, China

**Background.** Since December 2019, coronavirus disease 2019 (COVID-19), caused by severe acute respiratory syndrome coronavirus 2, occurred in Wuhan, and rapidly spread throughout China. This study aimed to clarify the characteristics of patients with refractory COVID-19.

**Methods.** In this retrospective single-center study, we included 155 consecutive patients with confirmed COVID-19 in Zhongnan Hospital of Wuhan University from 1 January to 5 February. The cases were divided into general and refractory COVID-19 groups according to the clinical efficacy of treatment after hospitalization, and the differences between groups were compared.

**Results.** Compared with patients with general COVID-19 (45.2%), those with refractory disease were older, were more likely to be male, and had more underlying comorbid conditions, a lower incidence of fever, higher maximum temperatures among patients with fever, higher incidences of shortness of breath and anorexia, more severe disease assessment at admission, higher neutrophil, aspartate aminotransferase, lactate dehydrogenase, and C-reactive protein levels, lower platelet counts and albumin levels, and higher incidences of bilateral pneumonia and pleural effusion ( $P < .05$ ). Patients with refractory COVID-19 were more likely to receive oxygen, mechanical ventilation, expectorant, and adjunctive treatment, including corticosteroids, antiviral drugs, and immune enhancers ( $P < .05$ ). Considering the factors of disease severity at admission, mechanical ventilation, and intensive care unit transfer, patients with refractory COVID-19 were also more likely to be male, have manifestations of anorexia on admission, and receive oxygen, expectorant, and adjunctive agents ( $P < .05$ ).

**Conclusion.** In nearly 50% of patients with COVID-19 obvious clinical and radiological remission was not achieved within 10 days after hospitalization. Male, anorexia, and no fever at admission was predictive of poor treatment efficacy.

**Keywords.** COVID-19; SARS-CoV-2; clinical efficacy; predictors.

Since December 2019, an outbreak of pneumonia of unknown cause occurred in Wuhan, China and rapidly spread throughout the country [1–3]. The pathogen was confirmed to be a distinct clade from the  $\beta$ -coronaviruses associated with the Middle East syndrome (MERS) and severe acute respiratory syndrome (SARS) [4, 5]. The novel virus was officially named SARS coronavirus 2 (SARS-CoV-2), with the disease termed coronavirus disease 2019 (COVID-19) [6]. Epidemiological data demonstrated person-to-person transmission in hospital and family settings [7, 8]. The high infectivity of COVID-19 resulted in a rapid increase of new cases and a worldwide outbreak [9, 10].

Up to now, no antiviral drug with definite effects has been found, and a focus on symptomatic support has been the main

therapeutic strategy. In some patients, treatment efficacy after hospitalization was poor, with ensuing development of severe pneumonia, pulmonary edema, acute respiratory distress syndrome, or multiple organ failure. At present, information regarding the clinical characteristics of refractory COVID-19 was scarce. In the study, we aimed to clarify the characteristics of patients with refractory COVID-19.

## METHODS

### Study Design and Participants

This retrospective study was approved by the ethics committee of Zhongnan Hospital of Wuhan University (no. 2020011). All consecutive patients with confirmed COVID-19 admitted to Zhongnan Hospital of Wuhan University from 1 January to 5 February were enrolled, and written or oral informed consent was obtained.

### Definitions

COVID-19 was confirmed by detecting SARS-CoV-2 RNA in throat swab samples using a virus nucleic acid detection kit according to the manufacturer's protocol (Shanghai BioGerm

Received 11 February 2020; editorial decision 9 March 2020; published online 16 March 2020.

<sup>a</sup>P. M., Y. Xing, Y. Xiao, and L. D. contributed equally to this work.

Correspondence: Y. Zhang, Zhongnan Hospital of Wuhan University, Wuhan 430071, Hubei, China (znact1936@126.com).

Clinical Infectious Diseases® 2021;73(11):e4208–13

© The Author(s) 2020. Published by Oxford University Press for the Infectious Diseases Society of America. All rights reserved. For permissions, e-mail: journals.permissions@oup.com.  
DOI: 10.1093/cid/ciaa270

Medical Biotechnology). For hospitalized patients, general COVID-19 was defined according to following criteria: (1) obvious alleviation of respiratory symptoms (eg, cough, respiratory distress, and shortness of breath) after treatment, (2) maintenance of normal body temperature for  $\geq 3$  days without the use of corticosteroid or antipyretics, (3) improvement in radiological abnormalities seen with chest computed tomography (CT) or radiography after treatment, and (4) a hospital stay of  $\leq 10$  days. Otherwise, it was classified as refractory COVID-19. **Figure 1** shows the chest CT findings in a patient with refractory COVID-19.

In severity assessment at admission, illness was considered serious if  $\geq 1$  of the following criteria was met: (1) respirations  $\geq 30$ /min; (2) pulse oximeter oxygen saturation  $\leq 93\%$  at rest; (3) ratio of partial pressure of arterial oxygen to fraction of inspired oxygen  $\leq 300$  mm Hg (1 mm Hg = 0.133 kPa); it was considered critical illness if  $\geq 1$  of the following criteria was met: (1) respiratory failure with receipt of mechanical ventilation; (2) shock; (3) combined with failure of other organs and receipt of care in the intensive care unit (ICU).

#### Data Collection

A COVID-19 case report form was designed to document primary data regarding demographic, clinical, laboratory, radiological, and therapeutic characteristics from electronic medical records. The following information was extracted for each patient: age, sex, medical history, COVID-19–related exposure history, symptoms, signs, severity assessment at admission, laboratory findings, chest CT or radiographic findings, and treatment (eg, antivirals, corticosteroids, and respiratory support).

#### Statistical Analysis

Categorical data were recorded as percentages, and continuous data as medians with interquartile ranges (IQRs). Nonparametric comparative tests were used for continuous data and  $\chi^2$  tests for categorical data to compare variables between groups. Differences were considered statistically significant at  $P < .05$ . The variables identified by means of univariate analysis ( $P < .05$ ) were analyzed using multivariate analysis, in which these variables were adjusted by 3 main factors (disease severity

at admission, mechanical ventilation, and ICU transfer). All statistical analyses were performed using SPSS Statistics software, version 21.0.

## RESULTS

#### Baseline Characteristics

A total of 155 patients with COVID-19 pneumonia were included in the current study (**Table 1**). The median (IQR) age was 54 (42–66) years, and 86 patients (55.5%) were male. Six patients (3.9%) were current smokers, and 37 (23.9%) had a history of exposure to source transmission (Huanan seafood market or infected individuals). Seventy-one patients (45.8%) had  $\geq 1$  comorbid conditions, including hypertension (23.9%), diabetes (9.7%), and cardiovascular diseases (9.7%). Fever (81.3%), fatigue (73.2%), cough (62.6%), and myalgia/arthralgia (61.0%) were the most common symptoms, whereas digestive symptoms were rare. At admission, 55 (35.5%) and 37 (23.9%) of the patients were categorized as having serious and critical illness, respectively.

After hospitalization, 70 patients (45.2%) reached obvious clinical and radiological remission within 10 days. Compared with patients with general COVID-19, those with refractory disease were significantly older ( $P < .001$ ) and more likely to be male ( $P = .01$ ). Meanwhile, with patients refractory COVID-19 have more underlying comorbid conditions ( $P < .001$ ), including diabetes ( $P = .04$ ), cardiovascular diseases ( $P = .002$ ), and cerebrovascular diseases ( $P = .04$ ), a lower incidence of fever ( $P = .01$ ), higher levels of maximum temperature among patients with fever ( $P = .005$ ), higher incidence of shortness of breath ( $P = .009$ ) and anorexia ( $P = .005$ ), and more severe disease assessment at admission ( $P < .001$ ).

#### Laboratory and Radiological Findings

At admission, the majority of patients had lymphopenia and abnormalities of neutrophils, platelets, alanine aminotransferase, aspartate aminotransferase, lactate dehydrogenase (LDH), and inflammatory biomarkers, as shown in **Table 2**. Chest CT or radiography showed bilateral pneumonia in 143 patients (92.3%), and pleural effusion in 16 (10.3%).

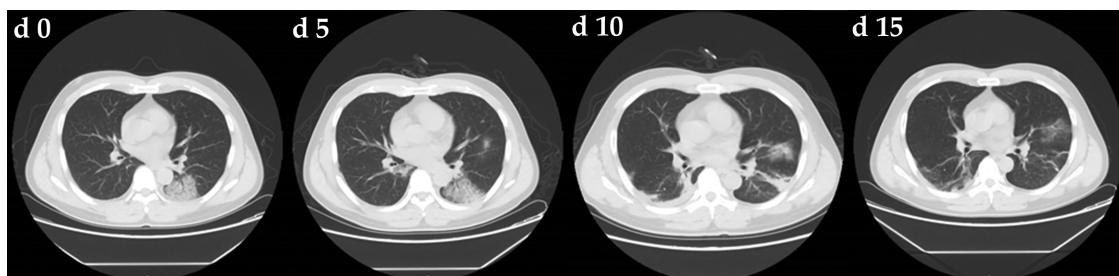

**Figure 1.** Chest computed tomographic images of a 42-year-old patient with refractory coronavirus disease 2019 pneumonia, obtained on 19 January (day 0), 24 January (day 5), 29 January (day 10), and 3 February (day 15) 2020. The patient reached remission on day 15.

**Table 1. Baseline Characteristics of Patients with Refractory Coronavirus Disease 2019**

| Characteristic                         | Patients, No. (%) <sup>a</sup> |                           |                              | P Value |
|----------------------------------------|--------------------------------|---------------------------|------------------------------|---------|
|                                        | Total (n = 155)                | General COVID-19 (n = 70) | Refractory COVID-19 (n = 85) |         |
| Age, median (IQR), y                   | 54 (42–66)                     | 46 (35–56)                | 61 (51–70)                   | <.001   |
| Male sex                               | 86 (55.5)                      | 31 (44.3)                 | 55 (64.7)                    | .01     |
| Current smoker                         | 6 (3.9)                        | 2 (2.9)                   | 4 (4.7)                      | .86     |
| Exposure to source transmission        | 37 (23.9)                      | 16 (22.9)                 | 21 (24.7)                    | .79     |
| Comorbid conditions, median (IQR), no. | 0 (0–1)                        | 0 (0–1)                   | 1 (0–1)                      | <.001   |
| Comorbid condition                     |                                |                           |                              |         |
| Hypertension                           | 37 (23.9)                      | 15 (21.4)                 | 22 (25.9)                    | .52     |
| Diabetes                               | 15 (9.7)                       | 3 (4.3)                   | 12 (14.1)                    | .04     |
| Cardiovascular disease                 | 15 (9.7)                       | 0 (0)                     | 14 (16.5)                    | .002    |
| Cerebrovascular disease                | 7 (4.5)                        | 0 (0)                     | 7 (8.2)                      | .04     |
| Cancer                                 | 7 (4.5)                        | 2 (2.9)                   | 5 (5.9)                      | .61     |
| Chronic liver disease                  | 7 (4.5)                        | 2 (2.9)                   | 5 (5.9)                      | .61     |
| Chronic renal disease                  | 6 (3.9)                        | 2 (2.9)                   | 4 (4.7)                      | .86     |
| COPD                                   | 5 (3.2)                        | 0 (0)                     | 4 (4.7)                      | .49     |
| Tuberculosis                           | 3 (1.9)                        | 0 (0)                     | 3 (3.5)                      | .32     |
| HIV                                    | 2 (1.3)                        | 0 (0)                     | 2 (2.4)                      | .56     |
| Symptoms and signs                     |                                |                           |                              |         |
| Fever                                  | 126 (81.3)                     | 63 (90.0)                 | 63 (74.1)                    | .01     |
| Maximum temperature, median (IQR), °C  | 38.5 (38.0–39.0)               | 38.3 (38.0–39.0)          | 38.8 (38.1–39.2)             | .005    |
| Cough                                  | 97 (62.6)                      | 43 (61.4)                 | 54 (63.5)                    | .79     |
| Chest distress                         | 61 (39.4)                      | 22 (31.4)                 | 39 (45.9)                    | .07     |
| Fatigue                                | 60 (39.2)                      | 33 (47.1)                 | 27 (31.8)                    | .69     |
| Shortness of breath                    | 50 (32.3)                      | 15 (21.4)                 | 35 (41.2)                    | .009    |
| Myalgia or arthralgia                  | 50 (32.3)                      | 28 (40.0)                 | 22 (26.0)                    | .60     |
| Anorexia                               | 26 (16.8)                      | 8 (11.4)                  | 18 (21.2)                    | .005    |
| Headache                               | 8 (5.2)                        | 3 (4.3)                   | 5 (5.9)                      | .55     |
| Diarrhea                               | 7 (4.5)                        | 2 (2.9)                   | 5 (5.9)                      | .61     |
| Abdominal pain                         | 3 (1.9)                        | 0 (0)                     | 2 (2.4)                      | >.99    |
| Nausea                                 | 3 (1.9)                        | 2 (2.9)                   | 0 (0)                        | >.99    |
| Vomiting                               | 3 (1.9)                        | 0 (0)                     | 2 (2.4)                      | .90     |
| Chest pain                             | 3 (1.9)                        | 2 (2.9)                   | 0 (0)                        | >.99    |
| Dizziness                              | 2 (1.3)                        | 0 (0)                     | 1 (1.2)                      | >.99    |
| Dyspnea                                | 2 (1.3)                        | 0 (0)                     | 2 (2.4)                      | .41     |
| Severity assessment at admission       |                                |                           |                              |         |
| Stable                                 | 63 (40.6)                      | 43 (61.4)                 | 20 (23.5)                    | <.001   |
| Serious                                | 55 (35.5)                      | 24 (34.3)                 | 31 (36.5)                    |         |
| Critical                               | 37 (23.9)                      | 3 (4.3)                   | 34 (40.0)                    |         |

Abbreviations: COPD, chronic obstructive pulmonary disease; COVID-19, coronavirus disease 2019; HIV, human immunodeficiency virus; IQR, interquartile range.

<sup>a</sup>Data represent no. (%) of patients unless otherwise specified.

Compared with patients with general COVID-19, those with refractory disease had higher levels of neutrophils ( $P = .02$ ), aspartate aminotransferase ( $P = .004$ ), LDH ( $P = .02$ ) and C-reactive protein (CRP) ( $P = .001$ ), and lower platelet counts ( $P = .049$ ) and albumin levels ( $P = .001$ ). Moreover, patients with refractory COVID-19 had a higher incidence of bilateral pneumonia ( $P = .03$ ) and pleural effusion ( $P = .006$ ).

### Treatment

Of the 155 patients, 102 patients (65.8%) received oxygen, and 36 (23.2%) mechanical ventilation (Table 3). Eighty-seven patients (56.1%) received expectorant, 79 (51%) received

intravenous corticosteroid, 45 (29%) received special antiviral treatment (arbidol, 20.0%, lopinavir and ritonavir, 17.4%, interferon inhalation, 19.4%), 14 (9%) received immune enhancing treatment (thymalfasin, 7.1%; immunoglobulin, 5.8%). The frequency of combined administration of adjunctive agents was 18.7% for corticosteroid plus antiviral drug, 8.4% for corticosteroid plus immune enhancer, 6.5% for antiviral drug plus immune enhancer, and 5.8% for the all. Patients with refractory COVID-19 were more likely than those with general COVID-19 to receive oxygen ( $P < .001$ ), mechanical ventilation ( $P < .001$ ), expectorant ( $P < .001$ ), corticosteroid ( $P < .001$ ), lopinavir and ritonavir ( $P = .008$ ), and immune enhancers ( $P = .01$ ), especially thymalfasin ( $P = .005$ ).

**Table 2. Laboratory and Radiological Findings in Patients with Refractory Coronavirus Disease 2019**

| Finding                                          | Normal Range | Median Value (IQR) |                  |                     | P Value |
|--------------------------------------------------|--------------|--------------------|------------------|---------------------|---------|
|                                                  |              | Total (n = 155)    | General (n = 70) | Refractory (n = 85) |         |
| <b>Blood cells counts, ×10<sup>9</sup>/L</b>     |              |                    |                  |                     |         |
| White blood cells                                | 3.5–9.5      | 4.36 (3.30–6.03)   | 4.16 (3.33–5.18) | 4.65 (3.14–6.84)    | .06     |
| Neutrophils                                      | 1.8–6.3      | 2.89 (1.97–4.41)   | 2.72 (1.88–3.53) | 3.28 (1.99–5.08)    | .02     |
| Lymphocytes                                      | 1.1–3.2      | 0.90 (0.66–1.11)   | 0.97 (0.79–1.28) | 0.80 (0.56–1.04)    | .10     |
| Platelets                                        | 125–350      | 170 (127–208)      | 179 (146–219)    | 159 (119–202)       | .049    |
| <b>Blood biochemistry</b>                        |              |                    |                  |                     |         |
| ALT, U/L                                         | 9–50         | 23 (16–38)         | 20 (15–33)       | 28 (17–42)          | .54     |
| AST, U/L                                         | 15–40        | 32 (24–48)         | 32 (23–38)       | 37 (25–65)          | .004    |
| Albumin, g/L                                     | 40–55        | 38 (34–41)         | 39 (36–42)       | 36 (32–40)          | .001    |
| Globulin, g/L                                    | 20–30        | 28 (26–31)         | 29 (26–32)       | 28 (26–31)          | .77     |
| Creatinine, μmol/L                               | 64–104       | 71 (60–87)         | 65 (58–78)       | 79 (65–96)          | .16     |
| LDH, U/L                                         | 125–243      | 277 (195–404)      | 241 (198–338)    | 293 (193–434)       | .02     |
| Creatine kinase, U/L                             | <171         | 93 (60–139)        | 100 (60–146)     | 89 (60–140)         | .56     |
| <b>Coagulation function</b>                      |              |                    |                  |                     |         |
| D-dimer, ng/mL                                   | 0–500        | 191 (123–358)      | 178 (100–289)    | 213 (126–447)       | .29     |
| <b>Infection-related biomarkers</b>              |              |                    |                  |                     |         |
| ESR, mm/h                                        | 0–15         | 25 (14–47)         | 23 (13–41)       | 28 (16–51)          | .09     |
| CRP, mg/L                                        | 0–10         | 33 (16–74)         | 23 (10–47)       | 46 (22–106)         | .001    |
| Interleukin 6, pg/mL                             | 0–7          | 45 (17–96)         | 23 (9–57)        | 64 (31–165)         | .26     |
| Procalcitonin, ng/mL                             | <0.05        | 0.05 (0.05–0.09)   | 0.05 (0.05–0.05) | 0.05 (0.05–0.19)    | .30     |
| <b>Coinfected respiratory pathogens, No. (%)</b> |              |                    |                  |                     |         |
| Parainfluenza virus                              | NA           | 12 (7.7)           | 3 (4.3)          | 9 (10.6)            | .14     |
| Syncytial virus                                  | NA           | 3 (1.9)            | 0 (0)            | 2 (2.4)             | >.99    |
| Adenovirus                                       | NA           | 3 (1.9)            | 0 (0)            | 3 (3.5)             | .32     |
| <i>Mycoplasma</i>                                | NA           | 2 (1.3)            | 1 (1.4)          | 1 (1.2)             | >.99    |
| Influenza virus A                                | NA           | 2 (1.3)            | 0 (0)            | 2 (2.4)             | .56     |
| Influenza virus B                                | NA           | 2 (1.3)            | 0 (0)            | 2 (2.4)             | .56     |
| <b>Chest CT or radiographic finding, No. (%)</b> |              |                    |                  |                     |         |
| Bilateral distribution                           | NA           | 143 (92.3)         | 61 (87.1)        | 82 (96.5)           | .03     |
| Pleural effusion                                 | NA           | 16 (10.3)          | 2 (2.9)          | 14 (16.5)           | .006    |

Abbreviations: ALT, alanine aminotransferase; AST, aspartate aminotransferase; CRP, C-reactive protein; CT, computed tomographic; ESR, erythrocyte sedimentation rate; IQR, interquartile range; LDH, lactate dehydrogenase; NA, not available.

<sup>a</sup>Data represent median (IQR) unless otherwise specified.

### Multivariate Analysis of Factors Associated With COVID-19 Refractoriness

Twenty-four significant factors in univariate analysis were put into the multivariate analysis to identify reliable predictive factor

for COVID-19 refractoriness (Table 4). The results indicated male sex (odds ratio, 2.206; 95% confidence interval, 1.012–4.809;  $P = .047$ ) and anorexia at admission (3.921; 1.144–13.443;

**Table 3. Treatment of Patients With Refractory Coronavirus Disease 2019 Disease**

| Treatment               | Patients, No. (%) |                           |                              | P Value |
|-------------------------|-------------------|---------------------------|------------------------------|---------|
|                         | Total (n = 155)   | General COVID-19 (n = 70) | Refractory COVID-19 (n = 85) |         |
| Oxygen                  | 102 (65.8)        | 30 (42.9)                 | 72 (84.7)                    | <.001   |
| Mechanical ventilation  | 36 (23.2)         | 0 (0)                     | 35 (41.2)                    | <.001   |
| Expectorant             | 87 (56.1)         | 24 (34.3)                 | 63 (74.1)                    | <.001   |
| Corticosteroid          | 79 (51.0)         | 24 (34.3)                 | 55 (64.7)                    | <.001   |
| Antiviral treatment     | 45 (29.0)         | 18 (25.7)                 | 27 (31.8)                    | .41     |
| Arbidol                 | 31 (20.0)         | 14 (20.0)                 | 17 (20.0)                    | >.99    |
| Lopinavir and ritonavir | 27 (17.4)         | 6 (8.6)                   | 21 (24.7)                    | .008    |
| Interferon inhalation   | 30 (19.4)         | 9 (12.9)                  | 21 (24.7)                    | .06     |
| Immune enhancer         | 14 (9.0)          | 2 (2.9)                   | 12 (14.1)                    | .01     |
| Thymalfasin             | 11 (7.1)          | 0 (0)                     | 11 (12.9)                    | .005    |
| Immunoglobulin          | 9 (5.8)           | 2 (2.9)                   | 7 (8.2)                      | .28     |

Abbreviation: COVID-19, coronavirus disease 2019.

**Table 4. Multivariate Analysis of Factors Associated with Refractory Coronavirus Disease 2019**

| Factor                            | B     | SE        | Wald  | PValue | OR (95% CI)           |
|-----------------------------------|-------|-----------|-------|--------|-----------------------|
| Age                               | 0.02  | 0.01      | 2.73  | .10    | 1.023 (.996–1.052)    |
| Male                              | 0.79  | 0.40      | 3.96  | .047   | 2.206 (1.012–4.809)   |
| Comorbid conditions               | 0.41  | 0.26      | 2.41  | .12    | 1.501 (.899–2.505)    |
| Diabetes                          | 0.76  | 0.76      | 1.00  | .32    | 2.138 (.483–9.471)    |
| Cardiovascular disease            | 2.13  | 1.10      | 3.74  | .053   | 8.377 (.973–72.15)    |
| Cerebrovascular disease           | 20.21 | 13 501.26 | 0.00  | >.99   | NA                    |
| Fever                             | –1.10 | 0.53      | 4.26  | .04    | 0.331 (.116–.945)     |
| Maximum temperature               | 0.33  | 0.27      | 1.49  | .22    | 1.393 (.818–2.371)    |
| Shortness of breath               | –0.42 | 0.52      | 0.66  | .42    | 0.655 (.236–1.822)    |
| Anorexia                          | 1.37  | 0.63      | 4.72  | .03    | 3.921 (1.144–13.443)  |
| Blood test                        |       |           |       |        |                       |
| Neutrophils                       | 0.05  | 0.09      | 0.28  | .60    | 1.051 (.876–1.261)    |
| Platelets                         | 0.00  | 0.00      | 1.15  | .28    | 0.997 (.992–1.002)    |
| Aspartate aminotransferase        | 0.00  | 0.01      | 0.00  | .97    | 1.000 (.984–1.0150)   |
| Albumin                           | –0.02 | 0.04      | 0.33  | .56    | 0.980 (.914–1.050)    |
| Lactate dehydrogenase             | 0.00  | 0.00      | 0.95  | .33    | 0.998 (.994–1.002)    |
| CRP                               | 0.01  | 0.01      | 2.05  | .15    | 1.009 (.997–1.021)    |
| Chest CT or radiographic findings |       |           |       |        |                       |
| Bilateral distribution            | 0.07  | 0.77      | 0.01  | .92    | 1.074 (.240–4.817)    |
| Pleural effusion                  | 1.17  | 0.85      | 1.89  | .17    | 3.217 (.607–17.036)   |
| Treatment                         |       |           |       |        |                       |
| Oxygen                            | 1.12  | 0.48      | 5.38  | .02    | 3.065 (1.189–7.897)   |
| Expectorant                       | 0.99  | 0.41      | 5.82  | .02    | 2.688 (1.204–6.003)   |
| Corticosteroid                    | 0.80  | 0.39      | 4.14  | .04    | 2.232 (1.030–4.838)   |
| Lopinavir and ritonavir           | 2.64  | 0.74      | 12.68 | <.001  | 13.975 (3.274–59.655) |
| Immune enhancer                   | 2.19  | 0.84      | 6.80  | .009   | 8.959 (1.724–46.564)  |
| Thymalfasin                       | 21.27 | 10 401.18 | 0.00  | >.99   | NA                    |

Abbreviations: B, partial regression coefficient; CI, confidence interval; CRP, C-reactive protein; CT, computed tomographic; NA, not available; OR, odds ratio; SE, standard error; Wald, Wald test.

$P = .03$ ) as the risk factors for disease refractoriness, and fever at admission as the protective factor (0.331; .116–.945;  $P = .03$ ). Moreover, patients with refractory COVID-19 were more likely to receive oxygen (odds ratio, 3.065; 95% confidence interval, 1.189–7.897;  $P = .02$ ), expectorant (2.688; 1.204–6.003;  $P = .02$ ), corticosteroids (2.232; 1.030–4.838;  $P = .04$ ), lopinavir and ritonavir (13.975; 3.274–59.655;  $P < .001$ ), and immune enhancers (8.959; 1.724–46.564;  $P = .009$ ).

## DISCUSSION

Since the outbreak of COVID-19, the number of patients had increased dramatically, and some patients had died of the disease. It had been reported that the median hospital stay of patients with COVID-19 pneumonia was 10 days [11]. In the study, the median (IQR) hospital stay was 10.5 (8–16) days for patients who died ( $n = 22$ ) and 10 (7–15) days for those who recovered. After 10 days or longer treatment, some patients had an exacerbation in clinical symptoms or radiological findings. Therefore, clinicians should identify refractory and critical illness quickly and provide early interventions, which was conducive to shortening the course of disease, preventing disease progression, and reducing the mortality rate. Up to now, large-scale analyses of clinical characteristics of refractory COVID-19 had been

scarce. In the current study, 155 patients with COVID-19 were divided into general and refractory groups. We compared clinical features, imaging manifestations, serological examination results, and treatment between 2 groups.

We found that despite a similar proportion of male and female patients in COVID-19, male patients had a higher incidence of refractory disease. The mean age of patients with refractory COVID-19 was significantly older than that of patients with general COVID-19. In addition, 49% of patients with COVID-19 had other chronic diseases, which was consistent with recent reports [11, 12]. Thus, it could be seen that elderly male patients with certain chronic diseases were more difficult to treat, resulting in long hospital stays and slow recoveries.

COVID-19 was similar to SARS and MERS in some clinical manifestations. In patients with COVID-19, fever, cough, and myalgia were the most common symptoms, followed by shortness of breath and respiratory distress. However, upper respiratory tract symptoms (eg, nasal congestion, nasal discharge, and sore throat) and gastrointestinal symptoms (eg, abdominal pain and diarrhea) were relatively rare. Fever occurred in 98%–100% of patients with SARS or MERS, compared with 81.3% of patients with COVID-19 in this study [13, 14], and 18.7% of patients presented no fever at admission, suggesting that the

absence of fever could not rule out the possibility of COVID-19. If fever was used to trigger screening/testing for COVID-19, a substantial number of patients without fever might be missed. It was worth noting that only 74.1% of patients with refractory disease presented with fever, a significantly lower proportion than in those with general COVID-19. These findings suggested that patients with a slow or muted response to the virus were more likely to have severe disease.

With regard to radiological findings, all patients in the current study had abnormal chest CT results. The lung lesions manifested mainly as ground glass-like and patchy shadows on CT scans. Patients with refractory COVID-19 had a higher incidence of pleural effusion than those with general COVID-19, suggesting a more obviously inflammatory response in the lung. These findings also indicated that SARS-CoV-2 mainly targets the cells in the lower respiratory tract.

For laboratory findings, 73.5% of patients with COVID-19 had lymphopenia, but no significant difference was detected between the groups. In patients with refractory COVID-19, blood LDH and CRP levels increased significantly. LDH is an inflammatory predictor in many pulmonary diseases, such as obstructive disease and microbial and interstitial pulmonary disease [15, 16]. CRP has been widely used as a biochemical indicator for inflammation, reflecting the acute severe systemic inflammatory response caused by viral infection. In a recent study, patients with COVID-19 treated in the ICU had higher levels of LDH and CRP than those not treated in the ICU [11]. These findings indicate that SARS-CoV-2 might act mainly on lymphocytes, involving cell-mediated immunity and cytokine storms. The immunological mechanism needs further study.

Currently, there are no published data indicating that any of the antiviral agents used in this outbreak have had a significant impact on outcome. Most patients recovered despite receiving antiviral and anti-inflammatory treatments, but recovery was due more to supportive care with oxygen, fluid management, mechanical ventilation as needed, pressor support, and ICU management. In the current study, patients with refractory COVID-19 were more likely than those with general COVID-19 to receive oxygen therapy, ventilator support, and a variety of adjunctive agents, indicating treatment insensitivity for these patients and resulting in a delay in the clinical course.

The current study had some limitations. First, selection bias might occur for this retrospective study, and further prospective

studies are needed. Second, this study was based on a single center, and a large-scale nationwide study is needed

In conclusion, in nearly 50% of patients with COVID-19, clinical and radiological remission could not be reached within 10 days after hospitalization. The presence of anorexia and no fever at admission was predictive of poor treatment efficacy.

## Notes

**Acknowledgments.** The authors thank the patients, the nurses, and the physicians who provided care for the patients, and the investigators at Zhongnan Hospital of Wuhan University.

**Potential conflicts of interest.** The authors: No reported conflicts of interest. All authors have submitted the ICMJE Form for Disclosure of Potential Conflicts of Interest.

## References

1. Huang C, Wang Y, Li X, et al. Clinical features of patients infected with 2019 novel coronavirus in Wuhan, China. *Lancet* **2020**; 395:497–506.
2. Li Q, Guan X, Wu P, Wang X, Zhou L. Early transmission dynamics in Wuhan, China, of novel coronavirus-infected pneumonia. *N Engl J Med* **2020**; 382:1199–207.
3. Lu H, Stratton CW, Tang YW. Outbreak of pneumonia of unknown etiology in Wuhan China: the mystery and the miracle. *J Med Virol* **2020**; 92:401–2.
4. Malik YS, Sircar S, Bhat S, et al. Emerging novel coronavirus (2019-nCoV)—current scenario, evolutionary perspective based on genome analysis and recent developments. *Vet Q* **2020**; 40:68–76.
5. Lu R, Zhao X, Li J, et al. Genomic characterisation and epidemiology of 2019 novel coronavirus: implications for virus origins and receptor binding. *Lancet* **2020**; 395:565–74.
6. Rothan HA, Byrareddy SN. The epidemiology and pathogenesis of coronavirus disease (COVID-19) outbreak. *J Autoimmun* **2020**; 109:102433.
7. Chan JF, Yuan S, Kok KH, et al. A familial cluster of pneumonia associated with the 2019 novel coronavirus indicating person-to-person transmission: a study of a family cluster. *Lancet* **2020**; 395:514–23.
8. Zhou P, Yang X, Wang X, et al. A pneumonia outbreak associated with a new coronavirus of probable bat origin. *Nature* **2020**; 579:270–3.
9. Lillie PJ, Samson A, Li A, et al. Novel coronavirus disease (Covid-19): the first two patients in the UK with person to person transmission. *J Infect* **2020**; 80:578–606.
10. Spina S, Marrazzo F, Migliari M, Stucchi R, Sforza A, Fumagalli R. The response of Milan's emergency medical system to the COVID-19 outbreak in Italy. *Lancet* **2020**; 395:e49–e50.
11. Wang D, Hu B, Hu C, et al. Clinical characteristics of 138 hospitalized patients with 2019 novel coronavirus-infected pneumonia in Wuhan, China. *JAMA* **2020**; 323:1061–9.
12. Chen N, Zhou M, Dong X, et al. Epidemiological and clinical characteristics of 99 cases of 2019 novel coronavirus pneumonia in Wuhan, China: a descriptive study. *Lancet* **2020**; 395:507–13.
13. Yin Y, Wunderink RG. MERS, SARS and other coronaviruses as causes of pneumonia. *Respirology* **2018**; 23:130–7.
14. Assiri A, Al-Tawfiq JA, Al-Rabeeh AA, et al. Epidemiological, demographic, and clinical characteristics of 47 cases of Middle East respiratory syndrome coronavirus disease from Saudi Arabia: a descriptive study. *Lancet Infect Dis* **2013**; 13:752–61.
15. Inamura N, Miyashita N, Hasegawa S, et al. Management of refractory *Mycoplasma pneumoniae* pneumonia: utility of measuring serum lactate dehydrogenase level. *J Infect Chemother* **2014**; 20:270–3.
16. Drent M, Cobben NA, Henderson RE, Wouters EF, van Dieijen-Visser M. Usefulness of lactate dehydrogenase and its isoenzymes as indicators of lung damage or inflammation. *Eur Respir J* **1996**; 9:1736–42.
